# Supplementary material
Source: PubMed Central journal article supplement (PMC6624164)
Supplement: supplement_material_djy157.pdf [file supplement_material_djy157.pdf]

## **SUPPLEMENTARY MATERIALS**

### **Clinical Impact of Tumor Mutational Burden in Neuroblastoma**

William L. Hwang<sup>1,2</sup>, Rachel L. Wolfson<sup>2</sup>, Andrzej Niemierko<sup>2,3</sup>, Karen J. Marcus<sup>2,4,5</sup>, Steven DuBois<sup>2,6</sup>, Daphne Haas-Kogan<sup>2,4,5,\*</sup>

\* Corresponding author

Daphne Haas-Kogan, MD  
450 Brookline Ave. D1622  
Boston, MA 02215-5450  
(617) 632-2291  
Dhaas-kogan@bwh.harvard.edu

### **AFFILIATIONS**

<sup>1</sup> Harvard Radiation Oncology Program, Boston, MA; <sup>2</sup> Harvard Medical School, Boston, MA; <sup>3</sup> Massachusetts General Hospital, Boston, MA; <sup>4</sup> Dana-Farber Cancer Institute, Boston, MA; <sup>5</sup> Brigham & Women's Hospital, Boston, MA; <sup>6</sup> Dana-Farber/Boston Children's Cancer and Blood Disorders Center, Boston, MA

**Supplementary Table 1.** Characteristics of patients with neuroblastoma according to tumor mutational burden\*

| <b>Characteristic</b>              | <b>Overall†<br/>No. (%)</b> | <b>High Tumor<br/>Mutational Burden<br/>No. (%)</b> | <b>Low Tumor<br/>Mutational Burden<br/>No. (%)</b> | <b>P value‡</b> |
|------------------------------------|-----------------------------|-----------------------------------------------------|----------------------------------------------------|-----------------|
| <b>Total</b>                       | 515 (100.0)                 | 107 (100.0)                                         | 408 (100.0)                                        | --              |
| <b>Age, months</b>                 |                             |                                                     |                                                    |                 |
| <b>&lt;18</b>                      | 141 (27.4)                  | 14 (13.1)                                           | 127 (31.1)                                         | <0.001          |
| <b>≥18</b>                         | 374 (72.6)                  | 93 (86.9)                                           | 281 (68.9)                                         |                 |
| <b>Sex</b>                         |                             |                                                     |                                                    |                 |
| <b>Female</b>                      | 201 (39.0)                  | 24 (41.4)                                           | 177 (44.2)                                         | 0.30            |
| <b>Male</b>                        | 257 (49.9)                  | 34 (58.6)                                           | 223 (55.8)                                         |                 |
| <b>Unknown</b>                     | 57 (11.1)                   | --                                                  | --                                                 |                 |
| <b>INSS stage at<br/>diagnosis</b> | 277 (53.8)                  | 50 (46.7)                                           | 227 (55.6)                                         | 0.10            |
| <b>Stage 4</b>                     | 238 (46.2)                  | 57 (53.3)                                           | 181 (44.4)                                         |                 |
| <b>Other</b>                       |                             |                                                     |                                                    |                 |
| <b>Histology</b>                   |                             |                                                     |                                                    |                 |
| <b>Favorable</b>                   | 106 (20.6)                  | 0 (0)                                               | 106 (30.5)                                         | 0.04            |
| <b>Unfavorable</b>                 | 251 (48.7)                  | 10 (100.0)                                          | 241 (69.5)                                         |                 |
| <b>Unknown</b>                     | 158 (30.7)                  | --                                                  | --                                                 |                 |
| <b>MYCN<br/>amplification</b>      | 359 (69.7)                  | 73 (68.2)                                           | 286 (70.6)                                         | 0.64            |
| <b>Not amplified</b>               | 153 (29.7)                  | 34 (31.8)                                           | 119 (29.4)                                         |                 |
| <b>Amplified</b>                   | 3 (0.6)                     | --                                                  | --                                                 |                 |
| <b>Unknown</b>                     |                             |                                                     |                                                    |                 |
| <b>Mutation count</b>              |                             | NA                                                  | NA                                                 | NA              |
| <b>0</b>                           | 192 (37.3)                  |                                                     |                                                    |                 |
| <b>1</b>                           | 130 (25.2)                  |                                                     |                                                    |                 |
| <b>2</b>                           | 57 (11.1)                   |                                                     |                                                    |                 |
| <b>3</b>                           | 29 (5.6)                    |                                                     |                                                    |                 |
| <b>4</b>                           | 16 (3.1)                    |                                                     |                                                    |                 |
| <b>5</b>                           | 9 (1.7)                     |                                                     |                                                    |                 |
| <b>6</b>                           | 12 (2.3)                    |                                                     |                                                    |                 |
| <b>7</b>                           | 8 (1.6)                     |                                                     |                                                    |                 |
| <b>&gt;7</b>                       | 62 (12.0)                   |                                                     |                                                    |                 |

\* High tumor mutational burden was defined as >3 mutations and low tumor mutational burden was defined as ≤3 mutations. INSS = International Neuroblastoma Staging System; NA = not applicable.

† Of the 515 patients with mutational data, 372 were derived from the TARGET database, 87 from the Amsterdam cohort, and 56 from the German cohort.

‡ Fisher's exact test, two-sided.

**Supplementary Table 2.** Frequency of mutations in cancer-associated genes in the neuroblastoma cohort ( $N = 515$ ).

| <b>Gene</b>      | <b>No. of Patients</b> | <b>Frequency, %</b> |
|------------------|------------------------|---------------------|
| <i>ALK</i>       | 11                     | 2.14                |
| <i>AR</i>        | 8                      | 1.55                |
| <i>NBPF1</i>     | 7                      | 1.36                |
| <i>LPP</i>       | 7                      | 1.36                |
| <i>NBPF10</i>    | 7                      | 1.36                |
| <i>ZNF717</i>    | 6                      | 1.17                |
| <i>MYCN</i>      | 5                      | 0.97                |
| <i>COL5A3</i>    | 5                      | 0.97                |
| <i>TET2</i>      | 5                      | 0.97                |
| <i>DNAH2</i>     | 5                      | 0.97                |
| <i>PTPN11</i>    | 5                      | 0.97                |
| <i>NF1</i>       | 5                      | 0.97                |
| <i>ANKRD30BL</i> | 5                      | 0.97                |
| <i>NEB</i>       | 4                      | 0.78                |
| <i>RYR1</i>      | 4                      | 0.78                |
| <i>MYH1</i>      | 4                      | 0.78                |
| <i>COL6A3</i>    | 4                      | 0.78                |
| <i>USP6</i>      | 4                      | 0.78                |
| <i>TPR</i>       | 3                      | 0.58                |
| <i>AKAP9</i>     | 3                      | 0.58                |
| <i>TIAM1</i>     | 3                      | 0.58                |
| <i>MUC16</i>     | 3                      | 0.58                |
| <i>TAF1L</i>     | 3                      | 0.58                |
| <i>AHNAK2</i>    | 3                      | 0.58                |
| <i>DOCK3</i>     | 3                      | 0.58                |
| <i>MYH8</i>      | 3                      | 0.58                |
| <i>IL31RA</i>    | 3                      | 0.58                |
| <i>AXL</i>       | 3                      | 0.58                |
| <i>KMT5B</i>     | 3                      | 0.58                |
| <i>ASB5</i>      | 3                      | 0.58                |
| <i>CBFA2T2</i>   | 3                      | 0.58                |
| <i>CNTN5</i>     | 3                      | 0.58                |
| <i>CSPG4</i>     | 3                      | 0.58                |
| <i>ATM</i>       | 3                      | 0.58                |
| <i>ZNF462</i>    | 2                      | 0.39                |
| <i>FAT4</i>      | 2                      | 0.39                |
| <i>KMT2B</i>     | 2                      | 0.39                |
| <i>NALCN</i>     | 2                      | 0.39                |

|                 |   |      |
|-----------------|---|------|
| <i>ARHGAP10</i> | 2 | 0.39 |
| <i>PDE8B</i>    | 2 | 0.39 |
| <i>WDR87</i>    | 2 | 0.39 |
| <i>ARID2</i>    | 2 | 0.39 |
| <i>FRMPD2</i>   | 2 | 0.39 |
| <i>MITF</i>     | 2 | 0.39 |
| <i>MKI67</i>    | 2 | 0.39 |
| <i>DAG1</i>     | 2 | 0.39 |
| <i>ATP13A5</i>  | 2 | 0.39 |
| <i>TSC2</i>     | 2 | 0.39 |
| <i>MYOM2</i>    | 2 | 0.39 |
| <i>PRKDC</i>    | 2 | 0.39 |
| <i>ARID1A</i>   | 2 | 0.39 |
| <i>RFESD</i>    | 2 | 0.39 |
| <i>DYSF</i>     | 2 | 0.39 |
| <i>TMC3</i>     | 2 | 0.39 |
| <i>DICER1</i>   | 2 | 0.39 |
| <i>ANO8</i>     | 2 | 0.39 |
| <i>FAN1</i>     | 2 | 0.39 |
| <i>SOS1</i>     | 2 | 0.39 |
| <i>LHCGR</i>    | 2 | 0.39 |
| <i>GJA3</i>     | 2 | 0.39 |
| <i>KRT10</i>    | 2 | 0.39 |
| <i>MYH11</i>    | 2 | 0.39 |
| <i>PDE6A</i>    | 2 | 0.39 |
| <i>LATS2</i>    | 2 | 0.39 |
| <i>ATN1</i>     | 2 | 0.39 |
| <i>DSC2</i>     | 2 | 0.39 |
| <i>MUC17</i>    | 2 | 0.39 |
| <i>XIRP2</i>    | 2 | 0.39 |
| <i>WWP1</i>     | 2 | 0.39 |
| <i>PCDHB12</i>  | 2 | 0.39 |
| <i>HGSNAT</i>   | 2 | 0.39 |
| <i>GIGYF2</i>   | 2 | 0.39 |
| <i>CASR</i>     | 2 | 0.39 |
| <i>MLLT6</i>    | 2 | 0.39 |
| <i>KDR</i>      | 2 | 0.39 |
| <i>SNX21</i>    | 2 | 0.39 |
| <i>ITGAE</i>    | 2 | 0.39 |
| <i>TTN</i>      | 2 | 0.39 |
| <i>NONO</i>     | 2 | 0.39 |
| <i>TNXB</i>     | 2 | 0.39 |

|                 |   |      |
|-----------------|---|------|
| <i>BAIAP2L2</i> | 2 | 0.39 |
| <i>TBP</i>      | 2 | 0.39 |
| <i>CACNA1A</i>  | 2 | 0.39 |
| <i>CACNA1B</i>  | 2 | 0.39 |
| <i>USP34</i>    | 2 | 0.39 |
| <i>RELN</i>     | 2 | 0.39 |
| <i>COL12A1</i>  | 2 | 0.39 |
| <i>EPHA6</i>    | 2 | 0.39 |
| <i>EP400</i>    | 2 | 0.39 |
| <i>DOCK8</i>    | 2 | 0.39 |
| <i>TNC</i>      | 2 | 0.39 |
| <i>PCLO</i>     | 2 | 0.39 |
| <i>TPTE2</i>    | 2 | 0.39 |
| <i>APC</i>      | 2 | 0.39 |
| <i>KLK14</i>    | 2 | 0.39 |
| <i>SIX1</i>     | 2 | 0.39 |
| <i>PTPRT</i>    | 2 | 0.39 |
| <i>KCNH4</i>    | 2 | 0.39 |
| <i>ARFGEF3</i>  | 2 | 0.39 |
| <i>MET</i>      | 2 | 0.39 |
| <i>NCOR2</i>    | 2 | 0.39 |
| <i>FAT1</i>     | 2 | 0.39 |
| <i>ARID1B</i>   | 2 | 0.39 |
| <i>PTPRC</i>    | 2 | 0.39 |
| <i>TTC23</i>    | 2 | 0.39 |
| <i>RLIM</i>     | 2 | 0.39 |
| <i>NPAP1</i>    | 2 | 0.39 |
| <i>RIPOR1</i>   | 2 | 0.39 |
| <i>CARD11</i>   | 2 | 0.39 |
| <i>KRTAP4-9</i> | 2 | 0.39 |
| <i>TDRD6</i>    | 2 | 0.39 |
| <i>HERC1</i>    | 2 | 0.39 |
| <i>STAG2</i>    | 2 | 0.39 |
| <i>LRIF1</i>    | 2 | 0.39 |
| <i>PLXNB1</i>   | 2 | 0.39 |
| <i>ESCO2</i>    | 1 | 0.19 |
| <i>PARP4</i>    | 1 | 0.19 |
| <i>IGFNI</i>    | 1 | 0.19 |
| <i>POGLUT1</i>  | 1 | 0.19 |
| <i>EPPK1</i>    | 1 | 0.19 |
| <i>POLE</i>     | 1 | 0.19 |
| <i>ARHGAP26</i> | 1 | 0.19 |

|                  |   |      |
|------------------|---|------|
| <i>ROR2</i>      | 1 | 0.19 |
| <i>NUP98</i>     | 1 | 0.19 |
| <i>FRS2</i>      | 1 | 0.19 |
| <i>LRP5</i>      | 1 | 0.19 |
| <i>NBN</i>       | 1 | 0.19 |
| <i>IRS1</i>      | 1 | 0.19 |
| <i>IDH1</i>      | 1 | 0.19 |
| <i>CLP1</i>      | 1 | 0.19 |
| <i>LRP1B</i>     | 1 | 0.19 |
| <i>CIC</i>       | 1 | 0.19 |
| <i>DKK2</i>      | 1 | 0.19 |
| <i>NOTCH4</i>    | 1 | 0.19 |
| <i>SMAD3</i>     | 1 | 0.19 |
| <i>EPHA5</i>     | 1 | 0.19 |
| <i>BLM</i>       | 1 | 0.19 |
| <i>FANCE</i>     | 1 | 0.19 |
| <i>CDKN1B</i>    | 1 | 0.19 |
| <i>NPM1</i>      | 1 | 0.19 |
| <i>ZNF750</i>    | 1 | 0.19 |
| <i>NCOA3</i>     | 1 | 0.19 |
| <i>MAP2K4</i>    | 1 | 0.19 |
| <i>KMT2D</i>     | 1 | 0.19 |
| <i>UBXN11</i>    | 1 | 0.19 |
| <i>PBRM1</i>     | 1 | 0.19 |
| <i>NRAS</i>      | 1 | 0.19 |
| <i>ATRX</i>      | 1 | 0.19 |
| <i>UHRF1BP1L</i> | 1 | 0.19 |
| <i>RASGRF1</i>   | 1 | 0.19 |
| <i>SYNE1</i>     | 1 | 0.19 |
| <i>ESR1</i>      | 1 | 0.19 |
| <i>DUSP2</i>     | 1 | 0.19 |
| <i>TLL2</i>      | 1 | 0.19 |
| <i>IL21R</i>     | 1 | 0.19 |
| <i>TET1</i>      | 1 | 0.19 |
| <i>WRN</i>       | 1 | 0.19 |
| <i>IRF8</i>      | 1 | 0.19 |
| <i>TPRX1</i>     | 1 | 0.19 |
| <i>ZNF727</i>    | 1 | 0.19 |
| <i>KMT2A</i>     | 1 | 0.19 |
| <i>RNF213</i>    | 1 | 0.19 |
| <i>ZFHX3</i>     | 1 | 0.19 |
| <i>ROS1</i>      | 1 | 0.19 |

|                 |   |      |
|-----------------|---|------|
| <i>BTLA</i>     | 1 | 0.19 |
| <i>GRIN2A</i>   | 1 | 0.19 |
| <i>MSH1</i>     | 1 | 0.19 |
| <i>IDH2</i>     | 1 | 0.19 |
| <i>ACVR1B</i>   | 1 | 0.19 |
| <i>CAMTA1</i>   | 1 | 0.19 |
| <i>DOT1L</i>    | 1 | 0.19 |
| <i>LCPI</i>     | 1 | 0.19 |
| <i>KRTAP5-7</i> | 1 | 0.19 |
| <i>NOTCH2</i>   | 1 | 0.19 |
| <i>RPL11</i>    | 1 | 0.19 |
| <i>PGR</i>      | 1 | 0.19 |
| <i>RRAGC</i>    | 1 | 0.19 |
| <i>EPHA3</i>    | 1 | 0.19 |
| <i>KNL1</i>     | 1 | 0.19 |
| <i>AGAP2</i>    | 1 | 0.19 |
| <i>CREB3L2</i>  | 1 | 0.19 |
| <i>PRDM1</i>    | 1 | 0.19 |
| <i>MAPKAP1</i>  | 1 | 0.19 |
| <i>FLT4</i>     | 1 | 0.19 |
| <i>AMER1</i>    | 1 | 0.19 |
| <i>STAG1</i>    | 1 | 0.19 |
| <i>AFF3</i>     | 1 | 0.19 |
| <i>NUMA1</i>    | 1 | 0.19 |
| <i>LILRA6</i>   | 1 | 0.19 |
| <i>RUNX1</i>    | 1 | 0.19 |
| <i>RUNXIT1</i>  | 1 | 0.19 |
| <i>PTEN</i>     | 1 | 0.19 |
| <i>BCOR</i>     | 1 | 0.19 |
| <i>CBFB</i>     | 1 | 0.19 |
| <i>FANCM</i>    | 1 | 0.19 |
| <i>TRRAP</i>    | 1 | 0.19 |
| <i>NLRP3</i>    | 1 | 0.19 |
| <i>STAT6</i>    | 1 | 0.19 |
| <i>HELB</i>     | 1 | 0.19 |
| <i>RAD50</i>    | 1 | 0.19 |
| <i>NEFH</i>     | 1 | 0.19 |
| <i>PASK</i>     | 1 | 0.19 |
| <i>KMT2C</i>    | 1 | 0.19 |
| <i>PPP3R1</i>   | 1 | 0.19 |
| <i>NF2</i>      | 1 | 0.19 |
| <i>EGFR</i>     | 1 | 0.19 |

|               |   |      |
|---------------|---|------|
| <i>MLLT1</i>  | 1 | 0.19 |
| <i>MLLT3</i>  | 1 | 0.19 |
| <i>ELF4</i>   | 1 | 0.19 |
| <i>ASXL2</i>  | 1 | 0.19 |
| <i>PC</i>     | 1 | 0.19 |
| <i>EP300</i>  | 1 | 0.19 |
| <i>TP53</i>   | 1 | 0.19 |
| <i>LILRA4</i> | 1 | 0.19 |



**Supplementary Table 3.** Characteristics of patients with mutation data compared to those without mutation data available.

| <b>Characteristic</b>          | <b>Mutation Data<br/>No. (%)</b> | <b>No Mutation Data<br/>No. (%)</b> | <b><i>P</i> value*</b> |
|--------------------------------|----------------------------------|-------------------------------------|------------------------|
| <b>Total</b>                   | 515 (100.0)                      | 704 (100.0)                         |                        |
| <b>Age, months</b>             |                                  |                                     |                        |
| <18                            | 141 (27.4)                       | 168 (23.9)                          | 0.16                   |
| ≥18                            | 374 (72.6)                       | 536 (76.1)                          |                        |
| <b>Sex</b>                     |                                  |                                     |                        |
| Female                         | 201 (39.0)                       | 298 (42.3)                          | 0.60                   |
| Male                           | 257 (49.9)                       | 406 (57.7)                          |                        |
| Unknown                        | 57 (11.1)                        |                                     |                        |
| <b>INSS stage at diagnosis</b> |                                  |                                     |                        |
| Stage 4                        | 277 (53.8)                       | 550 (78.1)                          | <0.001                 |
| Other                          | 238 (46.2)                       | 152 (21.6)                          |                        |
| Unknown                        |                                  | 2 (0.3)                             |                        |
| <b>Histology</b>               |                                  |                                     |                        |
| Favorable                      | 106 (20.6)                       | 169 (24.0)                          | 0.31                   |
| Unfavorable                    | 251 (48.7)                       | 464 (65.9)                          |                        |
| Unknown                        | 158 (30.7)                       | 71 (10.1)                           |                        |
| <b>MYCN amplification</b>      |                                  |                                     |                        |
| Not amplified                  | 359 (69.7)                       | 509 (72.3)                          | 0.18                   |
| Amplified                      | 153 (29.7)                       | 182 (25.9)                          |                        |
| Unknown                        | 3 (0.6)                          | 13 (1.8)                            |                        |

\* Fisher's exact test, two-sided.

INSS = International Neuroblastoma Staging System.
